# Supplementary material
Source: PubMed Central journal article supplement (PMC4251517)
Supplement: supp_2.4.E208_2013-0076_original_submission.pdf [file supp_2.4.E208_2013-0076_original_submission.pdf]

1  
2  
3  
4  
5  
6  
7  
8 Utilization of benzodiazepines and related  
9  
10  
11  
12 drugs: a Canadian population-based study,  
13  
14  
15  
16  
17  
18 1997 - 2012  
19  
20  
21  
22  
23  
24  
25  
26  
27  
28

29 Silvia Alessi-Severini<sup>§\*</sup>, Matthew E. Dahl<sup>f</sup>, James M. Bolton<sup>†¶□</sup>, Murray W. Enns<sup>†</sup>,  
30  
31 David M. Collins<sup>§</sup>, Dan Chateau<sup>f□</sup>, and Jitender Sareen<sup>†¶□</sup>  
32  
33  
34

35  
36 *§Faculty of Pharmacy, University of Manitoba; <sup>f</sup>Manitoba Centre for Health Policy,*

37  
38 *†Department of Psychiatry and <sup>□</sup>Department of Community Health Sciences,*

39  
40 *Faculty of Medicine, <sup>¶</sup>Department of Psychology, Faculty of Arts, University of*

41  
42  
43  
44 *Manitoba, Winnipeg, Manitoba, Canada*  
45

46  
47  
48 *\*corresponding author: Dr. Silvia Alessi-Severini, Faculty of Pharmacy, University*  
49  
50 *of Manitoba, Winnipeg, Manitoba, R3E 0T5, CANADA*  
51  
52  
53  
54  
55  
56  
57  
58  
59  
60

## Abstract

**Background:** Despite their favourable toxicology profile, benzodiazepines (BZDs) and Z-drugs, (i.e., zopiclone, zaleplon) have been associated with tolerance, dependence, and addiction.

Evidence of harm has been widely reported particularly in elderly populations. This study reports incidence and prevalence of BZD and Z-drug use in the entire population of Manitoba over a 16-year period.

**Methods:** Prescriptions data were obtained from the Drug Product Information Network (DPIN) database (April 1, 1996 - March 31, 2012). Sociodemographic information on patients receiving BZDs or Z-drugs was obtained from the Population Registry of Manitoba. Generalized Estimating Equations (GEE) were used to determine change of rates over time and the influence of users' sociodemographic characteristics.

**Results:** Overall BZD prevalence decreased from 174.7 in 1996/97 to 120.6 per 1,000 in 2011/12; however, the prevalence of Z-drug use increased steadily from 25.2 in 1996/97 to 93.9 per 1,000 in 2011/12. In the elderly, incidence rate of BZD use decreased from 55.5 in 1996/97 to 30.3 users per 1,000 in 2011/2012, while the incidence of Z-drugs increased from 7.3 to 20.3 users per 1,000. The 18 – 64 population showed a decrease in BZD incident use but the increase in Z-drug use was higher than 2-fold. The youngest population showed the lowest rates. Prevalent and incident use of BZDs and Z-drugs were higher in women of older age. Higher use of BZDs was observed in the low-income population.

**Conclusion:** BZDs are prescribed less frequently to elderly patients in Manitoba; however, zopiclone prescribing has continued to rise for all age groups.

## Introduction

1  
2 Benzodiazepines (BZDs) are one of the oldest classes of medications and they have been used  
3  
4 for decades as effective agents in a variety of diagnoses including anxiety disorders, insomnia  
5  
6 and seizures. While their toxicology profile is indubitably favourable when compared to other  
7  
8 hypnotic/sedatives (i.e., barbiturates), their long-term use has been associated with tolerance,  
9  
10 dependence, and addiction [1 - 3]. Evidence of harm, particularly in older people, has been  
11  
12 widely reported and includes higher risk for falls and fractures [4-5], motor vehicle collisions [7],  
13  
14 as well as cognitive disturbances [8]. The newer non-benzodiazepine agents, zopiclone,  
15  
16 zolpidem and zaleplon, commonly called Z-drugs, have a defined indication for sleep disorders  
17  
18 and appear to have a lower potential for dependence [9], nevertheless their use can also be  
19  
20 problematic for their effects on human performance and driving [10, 11]. As a consequence,  
21  
22 clinical practice guidelines have advised against long-term use of these medications and health  
23  
24 agencies worldwide have undertaken anti-BZDs and Z-drugs campaigns, not without  
25  
26 controversy [12 - 18]. However, the dearth of literature in this area suggests that such  
27  
28 recommendations do not seem to have impacted significantly on the utilization of BZDs and Z-  
29  
30 drugs in various countries including Canada [19 – 22]. The findings from other countries may not  
31  
32 be generalizable to Canada. The only population-based study conducted in Canada used data  
33  
34 from the province of BC and examined a period of 10 years between 1996 and 2006 [20]. Since  
35  
36 there are long delays between scientific knowledge and clinical practice, it is possible that there  
37  
38 may have been changes in prescribing patterns over the recent seven years. This study  
39  
40 describes the prescribing of BZDs and Z-drugs to the entire population of a Canadian province  
41  
42 over a period of 16 years and investigates characteristics of users and prescribers.  
43  
44  
45  
46  
47  
48  
49  
50  
51

## 52 **Methods**

### 53 **Study population**

54  
55  
56  
57  
58  
59  
60

1  
2 All Manitoba residents registered with the provincial health care system who were prescribed a  
3  
4 BZD or a Z-drug over the study period were included. No age restrictions were applied but  
5  
6 stratifications by age (0-17; 18-64; ≥65 years) and sex were applied. Region of residence (urban  
7  
8 vs. rural) and socioeconomic status (SES) were also assessed. According to validated  
9  
10 definitions [23], incident (new) users were defined as individuals who had not received a  
11  
12 prescription for any of the medications of interest in the year prior to receiving their first  
13  
14 prescription, while prevalent users were defined as individuals who had received at least one  
15  
16 prescription for a medication of interest in each index year.  
17  
18  
19

## 20 21 22 **Ethical Approval**

23  
24  
25 Ethical consent was obtained from the Health Research Ethics Board of the Faculty of Medicine,  
26  
27 University of Manitoba (#H2009-024). The study was conducted in full compliance with the  
28  
29 Personal Health Information Act of Manitoba and privacy/confidentiality consent was obtained  
30  
31 from the Health Information Privacy Committee of the Government of Manitoba (#2008/2009-48).  
32  
33  
34

## 35 36 **Data Source**

37  
38 Administrative data regarding use of BZDs and related medications (Z-drugs) between April  
39  
40 1,1996 and March 31, 2012 were obtained by accessing the Manitoba Population Health  
41  
42 Research Data Repository, housed at the Manitoba Centre for Health Policy. The Repository  
43  
44 contains health data for all residents of the province and holds records for virtually all contacts  
45  
46 with the Manitoba Health Services Insurance Plan (including physicians, hospitals, personal  
47  
48 care homes, home care, and pharmaceutical prescriptions) of all registered individuals. Patient  
49  
50 records within the Repository are de-identified using an encrypted personal health information  
51  
52 number as a quasi-identifier to protect privacy. Databases accessed for this study included the  
53  
54 Population Registry that contains demographic information of all residents of Manitoba and the  
55  
56  
57  
58  
59  
60

1 Drug Product Information Network (DPIN) that contains prescription data. DPIN captures  
2 prescriptions dispensed in Manitoba regardless of the type of coverage (government-sponsored,  
3 private or out-of-pocket), therefore providing a comprehensive description of outpatient drug use.  
4 Medications administered in hospital and physician samples are not captured. Prescriptions  
5 dispensed to First Nation patients served by northern nursing stations may be underestimated  
6 because of incomplete data entry in the DPIN system in early years. However, it has been  
7 determined that the database is over 90% accurate in capturing prescriptions dispensed in the  
8 community [24].  
9  
10  
11  
12  
13  
14  
15  
16  
17  
18  
19  
20

## 21 **Measures**

22 All BZDs available on the Canadian market at the time of study were included. All DINs (Drug  
23 Identification Numbers) were retrieved from Health Canada drug product database using the  
24 respective codes of the ATC (Anatomical Therapeutic Chemical) classification system as  
25 follows: alprazolam (N05BA12), bromazepam (N05BA08), chlordiazepoxide (N05BA02),  
26 clobazam (N05BA09), clonazepam (N03AE01), diazepam (N05BA01), flurazepam (N05BA17),  
27 lorazepam (N05BA06), oxazepam (N05BA04), temazepam (N05CD07), triazolam (N05CD05).  
28 Zopiclone (N05CF01) and zaleplon (N05CF03) utilization was analysed separately. Zolpidem  
29 has never been approved for sale in Canada.  
30  
31  
32  
33  
34  
35  
36  
37  
38  
39  
40  
41  
42  
43

44 Stratification by age was conducted and three age groups were identified: 0-17; 18-64; ≥65  
45 years. Users' region of residence (rural vs. urban) was determined by postal codes registered  
46 with Manitoba Health. SES was determined on the basis of the median neighbourhood income  
47 quintiles from Statistics Canada based on the dissemination area in which they resided: low  
48 income included the lowest and second lowest quintiles, high income included the three highest  
49 quintiles. Individuals for whom a neighbourhood income could not be assigned (i.e., residents of  
50 personal care homes, psychiatric facilities, prisons or wards of the Public Trustee and Child and  
51  
52  
53  
54  
55  
56  
57  
58  
59  
60

1  
2 Family services) were grouped into a “not found” category (NF). Prescriber specialties were  
3  
4 derived from the “scrambled” physician identification number reported on the prescription and  
5  
6 classified as general practitioner (GP), psychiatrist or “other” medical specialty.  
7  
8  
9

## 10 **Analyses**

11  
12 Separate analyses were conducted to evaluate prevalent and incident utilization of BZDs and Z-  
13  
14 drugs. Generalized Estimating Equations (GEE), which addressed the correlated structure of  
15  
16 the data, were used to analyse the incident and prevalent utilization over time as number of  
17  
18 users per 1,000, and to determine the influence of sociodemographic characteristics (i.e., age,  
19  
20 sex, region of residence and SES) on prescribing over the entire study period as described  
21  
22 above. Analyses were performed using SAS statistical software, version 9.2 (SAS Institute,  
23  
24 Cary, North Carolina).  
25  
26  
27  
28  
29

## 30 **Results**

### 31 **Incidence**

32  
33  
34 Overall incidence rates of utilization are presented in Figure 1. BZD use decreased from 26.3  
35  
36 new users per 1,000 in 1996/97 to 22.5 per 1,000 persons in 2011/12 fiscal year, while  
37  
38 utilization of Z-drugs increased from 3.9 to 9.9 per 1,000 during the same time period.  
39  
40  
41  
42  
43

44  
45 Incidence rate of BZD use decreased significantly in the older adults ( $\geq 65$  years of age) from  
46  
47 55.5 per 1,000 in 1996/97 to 30.3 per 1,000 in 2011/2012, but use of Z-drugs consistently  
48  
49 increased in this population from 7.3 per 1,000 to 20.3 per 1,000 over the same time period  
50  
51 (Figure 2). There were a total 37,691 new elderly users of zopiclone (or zaleplon) between  
52  
53 1996/97 and 2011/2012.  
54  
55  
56

57  
58 The adult population between 18 and 64 years of age showed a slight decrease in BZD incident  
59  
60

1  
2 use from 30.1 per 1,000 to 27.6, but the increase in Z-drug use was higher than 2-fold from 4.7  
3  
4 per 1,000 in 1996/97 to 11.1 per 1,000 in 2011/12 (Figure 2). Total new users of  
5  
6 zopiclone/zaleplon in the 18-64 years of age group between 1996/97 and 2011/12 were 99,361.  
7  
8

9  
10 The youngest segment of the population (up to 17 years of age) showed the lowest overall rates  
11  
12 of incident use of BZDs and Z-drugs with only 1,589 new users of Z-drugs over the time period  
13  
14 of the study; however, in this population both classes of drugs showed a significant increase in  
15  
16 utilization from 2.20 per 1,000 in 1996/97 to 3.95 per 1,000 in 2011/12 for BZDs and from 0.19  
17  
18 per 1,000 to 0.39 per 1,000 for Z-drugs over the same time period (Figure 2).  
19  
20

## 21 22 **Prevalence**

23  
24  
25  
26 Overall prevalence of BZD use in the entire population increased slightly from 66.7 users per  
27  
28 1,000 in 1996/97 to 72.4 users per 1,000 in 2011/12, but prevalence of Z-drug use increased  
29  
30 significantly from 10.9 per 1,000 in 1996/97 to 37.0 per 1,000 in 2011/12 (Figure 3).  
31  
32

33  
34 Stratification by age group (Figure 4) showed that since 2005/06 the elderly population had the  
35  
36 highest prevalence of use for both BZDs and Z-drugs. BZD prevalence decreased from 174.7  
37  
38 per 1,000 in 1996/97 to 120.6 in 2011/12; however, the prevalence of Z-drug use increased  
39  
40 steadily from 25.2 per 1,000 in 1996/97 to 93.9 per 1,000 in 2011/12. In the two other age  
41  
42 groups prevalence of BZD use increased from 62.1 to 67.9 per 1,000 and from 2.7 to 5.6 per  
43  
44 1,000 in the 18 - 64 age group and in the 0-17 group, respectively. For the Z-drugs, prevalence  
45  
46 increased from 12.2 to 37.8 per 1,000 and from 0.29 to 0.62 per 1,000 in the 18 - 64 age group  
47  
48 and in the 0-17 group, respectively (Figure 4).  
49  
50

51  
52  
53 Denominators for the three age groups ranged from 296,658 in 1996/97 to 291,782 in 2011/12  
54  
55 for the 0-17 years of age, from 692,539 to 793,093 for the 18-64 years of age, and from 154,890  
56  
57 to 176,498 for the 65 years of age and older.  
58  
59  
60

## Effects of age, sex, place of residence and SES

Stratification by sex was also conducted. Incidence rates in females were higher than in males across the 16-year observation period for both BZD and Z-drug use. BZD use decreased slightly in females from 33.2 to 28.3 per 1,000, compared to a decrease from 19.2 to 17.3 per 1,000 in males. Incidence rates for Z-drug use increased in females from 4.6 to 11.8 per 1,000, while in males the increase was from 3.2 to 8.0 per 1,000. Prevalence of BZD use in males was 42.7 per 1,000 in 1996/97 and 44.4 per 1,000 in 2011/12. In females prevalence was 80.1 per 1,000 in 1996/97 and 77.0 in 2011/12. Prevalence of Z-drug use increased from 13.4 to 47.4 per 1,000 in females and from 8.3 to 26.4 per 1,000 in males. Please refer to Table 1 and Table 2 for details.

## Prescribers

In 2011/12, more than 1 million prescriptions for BZDs and Z-drugs were dispensed in Manitoba. In 1996/97 a total of 379,259 prescriptions were for BZDs alone and 44,020 were for Z-drugs. In 2011/12, the number of prescriptions for BZDs and Z-drugs had increased to 726,409 and 277,811, respectively. Lorazepam was the most prescribed BZD accounting for more than 1/3 of all BZD prescriptions across the timeframe of the study. Each year general practitioners wrote more than 80% of all prescriptions and psychiatrists wrote approximately 15 % of all prescriptions, the rest was written by physicians of other medical specialties.

## Interpretation

Substantial prescription pattern changes were observed over time in the population of Manitoba. Fewer patients were initiated on a BZD during the study period; however, the prevalence of use was not significantly affected and it remained relatively stable in the adult population between 18



1  
2 and 64 years of age, which suggests that patients are probably staying on the medications  
3  
4 longer than recommended.  
5

6  
7 Our analyses discriminated between BZDs and zopiclone/zaleplon, which are not chemically  
8  
9 related to BZDs but share similar pharmacological activity on the GABA<sub>A</sub> receptor. These  
10  
11 agents have been marketed as hypnotic medications superior to BZDs mainly because of their  
12  
13 favourable pharmacokinetic and safety profiles despite a lack of evidence for substantial clinical  
14  
15 improvement [25].  
16  
17  
18  
19

20  
21 Our findings are similar to those observed in other studies conducted internationally where the  
22  
23 utilization of BZDs and Z-drugs was assessed separately [26-29] and confirm that Z-drugs have  
24  
25 largely replaced BZDs especially in the elderly population. In Canada, prescribing of BZDs and  
26  
27 Z-drugs in the population of British Columbia was described by a report covering a 10-year span  
28  
29 from 1996 to 2006 [20]. The results showed a slight decrease in the overall utilization of both  
30  
31 BZDs and Z-drugs in the elderly population, but an overall increase in the younger segments of  
32  
33 the population, particularly in females and in individuals of low income.  
34  
35  
36  
37

38  
39 Sex differences have been observed in our study: both prevalent and incident use of BZDs and  
40  
41 Z-drugs were consistently higher in women especially of older age. While this finding is not  
42  
43 unique to the Canadian context, studies in other countries where insurance coverage of short-  
44  
45 acting BZDs and Z-drugs is restricted have reported that male patients were more likely to  
46  
47 receive BZDs compared to females [28]. Place of residence did not seem to have a significant  
48  
49 effect on incidence rates, while low SES show opposite effects for BZD and Z-drug use, with  
50  
51 more pronounced use of BZDs in the low income segment of the population. We speculate that  
52  
53 the higher rates of mental disorders in women and lower socioeconomic status groups may  
54  
55 explain the higher rates of benzodiazepines [30].  
56  
57  
58  
59  
60

1  
2 Limitations of our study are seen in the administrative nature of the data used for the analyses,  
3  
4 which do not provide information on the clinical benefits of medication use. Our study did not  
5  
6 capture medications used in hospitals, or in a limited number of personal care homes (nursing  
7  
8 homes) of the province; however, the DPIN database is comprehensive of outpatient use of  
9  
10 pharmaceuticals regardless of insurance coverage. Moreover, psychotropic medications such  
11  
12 as BZDs and Z-drugs have been historically covered by the government-sponsored drug  
13  
14 programs as unrestricted benefits. As a result no segment of the province population could  
15  
16 have experienced any limitation in terms of access to their prescriptions.  
17  
18  
19

20  
21 The DPIN database does not include information on diagnoses, therefore reasons for  
22  
23 prescribing cannot be determined; however, Z-drugs are indicated specifically for the treatment  
24  
25 of insomnia and are still perceived by general practitioners as more effective and safer than  
26  
27 BZDs for this indication [31]. Therefore, it could be inferred that insomnia might be the most  
28  
29 prevalent diagnosis affected by a switch in new prescriptions from a BZD to a Z-drug. It is  
30  
31 important to note that zaleplon was discontinued in 2007 and the number of users has been  
32  
33 generally quite low over the timeframe of the study. Zopiclone is in fact the only agent that  
34  
35 demonstrated a rapid increase in utilization rate in the last few years. Finally, it is recognized  
36  
37 that prescription databases are only records of dispensations. Data collected are only “proxy” of  
38  
39 use as it is unknown if prescriptions filled are actually consumed.  
40  
41  
42  
43  
44  
45

46 Our study was not designed to assess the impact of specific warnings or interventions aimed at  
47  
48 improving prescribing habits; however, it appears that physicians in Manitoba have been  
49  
50 concerned about the potential harm of prescribing BZDs to their elderly patients, as it has been  
51  
52 the case for other psychotropic medications [32], and have responded by initiating fewer and  
53  
54 fewer older individuals on a BZD over the study period. The rise in zopiclone prescribing,  
55  
56 however, remains a reason for concern.  
57  
58  
59  
60

## Conclusion

While BZDs are prescribed less frequently to elderly patients in Manitoba, zopiclone prescribing has continued to rise in all age groups. It remains to be investigated if the decline of BZD use in the elderly is limited to the diagnosis of insomnia or whether other medications have replaced BZD therapy in conditions such as anxiety. Patients of all ages seem to stay on a BZD or zopiclone for extended periods of time and might experience difficulties in discontinuing treatment. It will be important to explore interventions [33] that can be successful in helping patients discontinue BZD and Z-drug use when no longer necessary.

**Acknowledgements/disclaimers:** The authors acknowledge the Manitoba Centre for Health Policy, University of Manitoba, for use of data contained in the Population Health Research Data Repository under project # 2009-020, and derived from data provided by Manitoba Health. The results and conclusions are those of the authors and no official endorsement by Manitoba Health, the Manitoba Centre for Health Policy or other data providers is intended or should be inferred.

Preparation of this article was supported by an operating grant from the Health Sciences Centre Foundation (Dr. Bolton and Dr. Alessi-Severini). Additional investigator support includes the following salary awards: a Manitoba Health Research Council Establishment Award (Dr. Bolton), a Manitoba Health Research Council Chair Award (Dr. Sareen), and a Canadian Institutes of Health Research New Investigator Award (#152348 Dr. Sareen).

## References

1. Miller LG, Woolverton S, Greenblatt DJ et al. Chronic benzodiazepine administration. IV. Rapid development of tolerance and receptor downregulation associated with alprazolam administration. *Biochem Pharmacol* 38: 3773-3777, 1989
2. Lader M. History of benzodiazepine dependence. *J Subst Abuse Tr* 8: 53-59, 1991
3. Busto U, Lanctot KL, Isaac P, Adrian M. Benzodiazepine use and abuse in Canada. *Can Med Assoc J* 141: 917-921, 1989
4. Leipzig RM, Cumming RG, Tinetti ME. Drugs and falls in older people: a systematic review and meta-analysis: I. Psychotropic drugs. *Journal of the American Geriatrics Society* 47(1): 30-39, 1999
5. Barlett G, Abrahamowicz M, Grad R et al. Association between risk factors for injurious falls and new benzodiazepine prescribing in older adults. *BMC Fam Pract* 10:1-8, 2009
6. Hill KD and Wee R. Psychotropic drug-induced falls in older people. *Drugs Aging* 29(1): 15-30, 2012
7. Chang CM, Chia-Husuan E, Chen CY et al. Psychotropic drugs and risk of motor vehicle accidents: a population-based case-control study. *BJCP* 75(4): 1125-1133, 2012
8. Barker MJ, Greenwood KM, Jackson M and Crowe SF. Cognitive effects of long-term benzodiazepine use: a meta-analysis. *CNS Drugs* 18(1): 37-48, 2004
9. Hajak G, Muller WE, Wittchen HU, et al. Abuse and dependence of potential for the non-benzodiazepine hypnotics zolpidem and zopiclone: a review of case reports and epidemiological data. *Addiction* 98: 1371 – 1378, 2003

- 1  
2 10. Orriols L, Moore PP, Castot A, et al. Benzodiazepine-like hypnotics and the associated risk  
3 of road traffic accidents. Clin Pharmacol Ther 89(4): 595-601, 2011  
4  
5  
6  
7 11. Gunja N. In the Zzz zone: the effects of z-drugs on human performance and driving. J Med  
8 Toxicol 9:163-171, 2013  
9  
10  
11  
12 12. Benzodiazepine warning. UK, 2004 available at <http://www.benzo.org.uk/cmo.htm> Accessed  
13 on September 24, 2013  
14  
15  
16  
17  
18  
19 13. BEAT THE BENZOS - A CALL FOR EUROPEAN UNION GUIDELINES ON THE  
20 PRESCRIBING OF BENZODIAZEPINES, EUROPE'S MOST HARMFUL DRUGS. Barry  
21 Haslam, Beat the Benzos Campaign, February 2004 available at  
22 <http://www.benzo.org.uk/btb4.htm> accessed on September 24, 2013  
23  
24  
25  
26  
27  
28  
29 14. National Prescribing Centre (UK NHS). Benzodiazepines and newer hypnotics. MeReC  
30 Bulletin 5:17–20, 2005  
31  
32  
33  
34  
35 15. Fick DM, Cooper JW, Wade WE, Waller JL, Maclean JR, Beers MH. Updating the Beers  
36 criteria for potentially inappropriate medication use in older adults: results of a US Consensus  
37 Panel of Experts. Archives of Internal Medicine;163(22):2716–2724, 2003  
38  
39  
40  
41  
42  
43 16. McLeod PJ, Huang AR, Tamblyn RM, Gayton DC. Defining inappropriate practices in  
44 prescribing for elderly people: a national consensus panel. Canadian Medical Association  
45 Journal (CMAJ);156(3):385–91, 1997  
46  
47  
48  
49  
50  
51 17. Beers MH. Explicit criteria for determining potentially inappropriate medication use by the  
52 elderly: an update. Archives of Internal Medicine 157(14):1531–6, 1997  
53  
54  
55  
56  
57  
58  
59  
60

- 1  
2 18. el-Guebaly N, Sareen J and Stein MB. Are there guidelines for the responsible prescription  
3  
4 of benzodiazepines? *Can J Psychiatry*, 55(11): 137 – 141, 2010  
5  
6  
7  
8 19. Stephenson CP, Karages E and McGRregor IS. Trends in utilisation of psychotropic  
9  
10 medications in Australia from 2000 to 2011. *Aust NZ J Psychiatry* 47: 74-87, 2013  
11  
12  
13 20. Cunningham CM, Hanley GE and Morgan S. Patterns of use of benzodiazepines in British  
14  
15 Columbia: examining the impact of increasing research and guideline cautions against long-term  
16  
17 use. *Health Policy* 97: 122-129, 2010  
18  
19  
20  
21 21. Ilyas S and Moncrieff J. Trends in prescriptions and costs of drugs for mental disorders in  
22  
23 England, 1998-2010. *BJ Psych* 200:393-398, 2012  
24  
25  
26  
27 22. Gorevski E, Bian B, Kelton CML, et al. Utilization, spending and price trends for  
28  
29 benzodiazepines in the US Medicaid program: 1991-2009. *Ann Pharmacother* 46: 503-512,  
30  
31 2012  
32  
33  
34  
35 23. MCHP concept dictionary and glossary. Available at  
36  
37 [http://www.umanitoba.ca/faculties/medicine/units/community\\_health\\_sciences/departamental\\_uni](http://www.umanitoba.ca/faculties/medicine/units/community_health_sciences/departamental_uni)  
38  
39 [ts/mchp/resources/concept\\_dictionary.html](http://www.umanitoba.ca/faculties/medicine/units/community_health_sciences/departamental_uni) Accessed on October 7, 2013  
40  
41  
42  
43 24. Kozyrskyj A, Mustard, D: Validation of an electronic, population based prescription database.  
44  
45 *Ann Pharmacother* 32: 1152–1157, 1998  
46  
47  
48  
49 25. NHS, NICE (National Institute for Clinical Excellence - Guidance on the use of zaleplon,  
50  
51 zolpidem and zopiclone for the short-term management of insomnia. 2007  
52  
53  
54  
55 26. Clay E, Falissard B, Moore T, and Toumi M. Contribution of prolonged-release melatonin  
56  
57 and anti-benzodiazepine campaigns to the reduction of benzodiazepine and z-drugs  
58  
59  
60

1  
2 consumption in nine European countries. Eur J Clin Pharmacol DOI 10.1007/s00228-012-1424-  
3  
4 1, 2012  
5

6  
7 27. Neutel CI, Skkurtveit S and Berg C. What is the point of guidelines? Benzodiazepines and Z-  
8  
9 hypnotic use by an elderly population. Sleep Medicine 13: 893 -897, 2012  
10

11  
12 28. Johnell K and Fastbom J. Gender and use of hypnotics or sedatives in old age: a  
13  
14 nationwide register-based study. Int J Clin Pharm 33:788-793, 2011  
15

16  
17 29. Hausken AM, Furu K, Skurtveit S et al. Starting insomnia treatment: use of benzodiazepines  
18  
19 versus z-hypnotics: a prescription database study of predictors. Eur J Clin Pharmacol 65: 295-  
20  
21 301, 2009  
22  
23

24  
25 30. Sareen J, Afifi TO, McMillan KA, Asmundson GJ. Relationship between household income  
26  
27 and mental disorders: findings from a population-based longitudinal study. Arch Gen Psychiatry  
28  
29 68:419-427, 2011  
30  
31

32  
33 31. Hoffman F. Perceptions of German GPs on benefits and risks of benzodiazepines and z-  
34  
35 drugs. Swiss Med Wkly 143: w13745, 2013  
36  
37

38  
39 32. Alessi-Severini S, Dahl M, Schultz J, Metge C, Raymond C. Prescribing of psychotropic  
40  
41 medications to the elderly population of a Canadian province: a retrospective study using  
42  
43 administrative databases. PeerJ, DOI 10.7717/peerj.168, 2013  
44  
45

46  
47 33. Martin P, Tamblyn R, Ahamed S and Tannenbaum C. A drug education tool developed for  
48  
49 older adults changes knowledge, beliefs and risk perceptions about inappropriate  
50  
51 benzodiazepines prescriptions in the elderly. Patient Education and Counseling 92: 81-87, 2013  
52  
53  
54

1  
2  
3  
4  
5  
6  
7  
8  
9  
10  
11  
12  
13  
14  
15  
16  
17  
18  
19  
20  
21  
22  
23  
24  
25  
26  
27  
28  
29  
30  
31  
32  
33  
34  
35  
36  
37  
38  
39  
40  
41  
42  
43  
44  
45  
46  
47  
48  
49

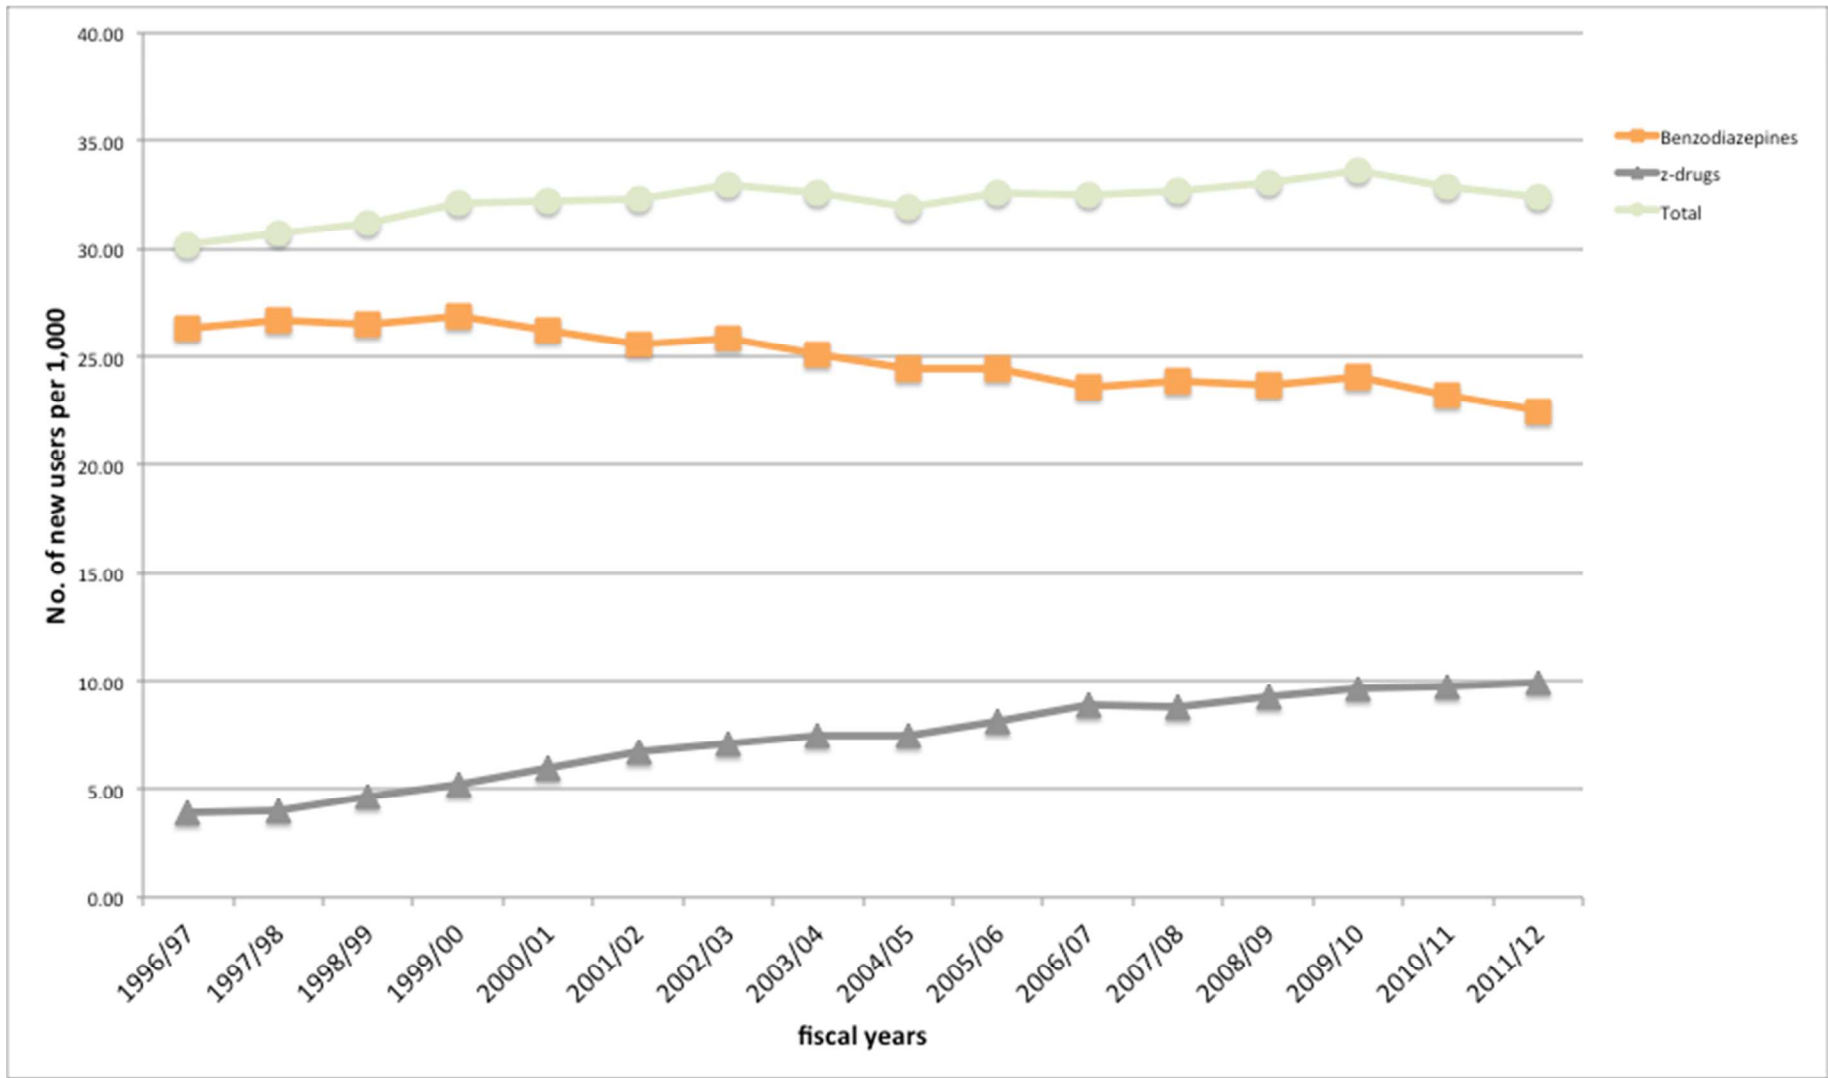

Figure 1- Crude incidence rates of use of benzodiazepines and Z-drugs



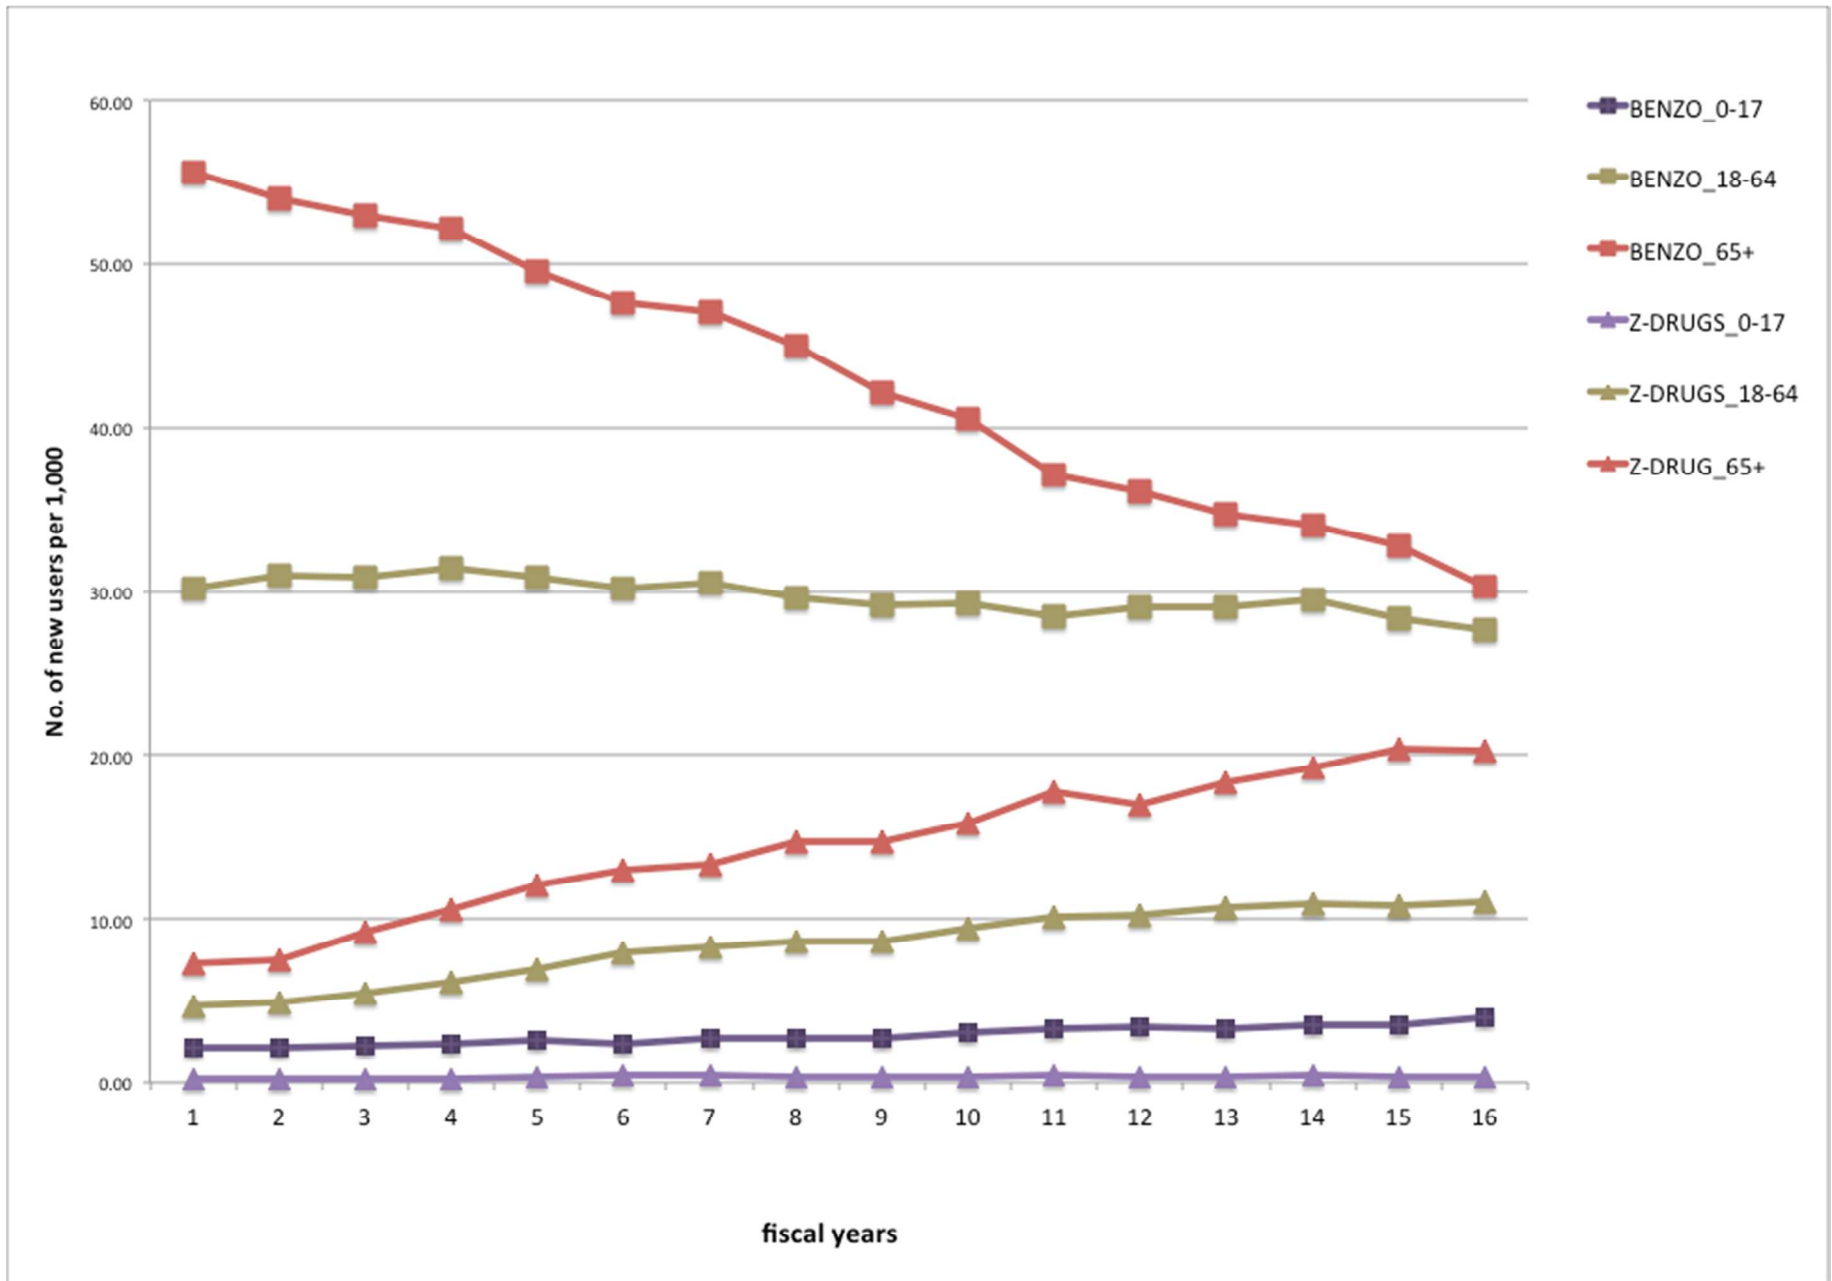

Figure 2- Crude incidence rates of use of benzodiazepines and Z-drugs by age group

1  
2  
3  
4  
5  
6  
7  
8  
9  
10  
11  
12  
13  
14  
15  
16  
17  
18  
19  
20  
21  
22  
23  
24  
25  
26  
27  
28  
29  
30  
31  
32  
33  
34  
35  
36  
37  
38  
39  
40  
41  
42  
43  
44  
45  
46  
47  
48  
49

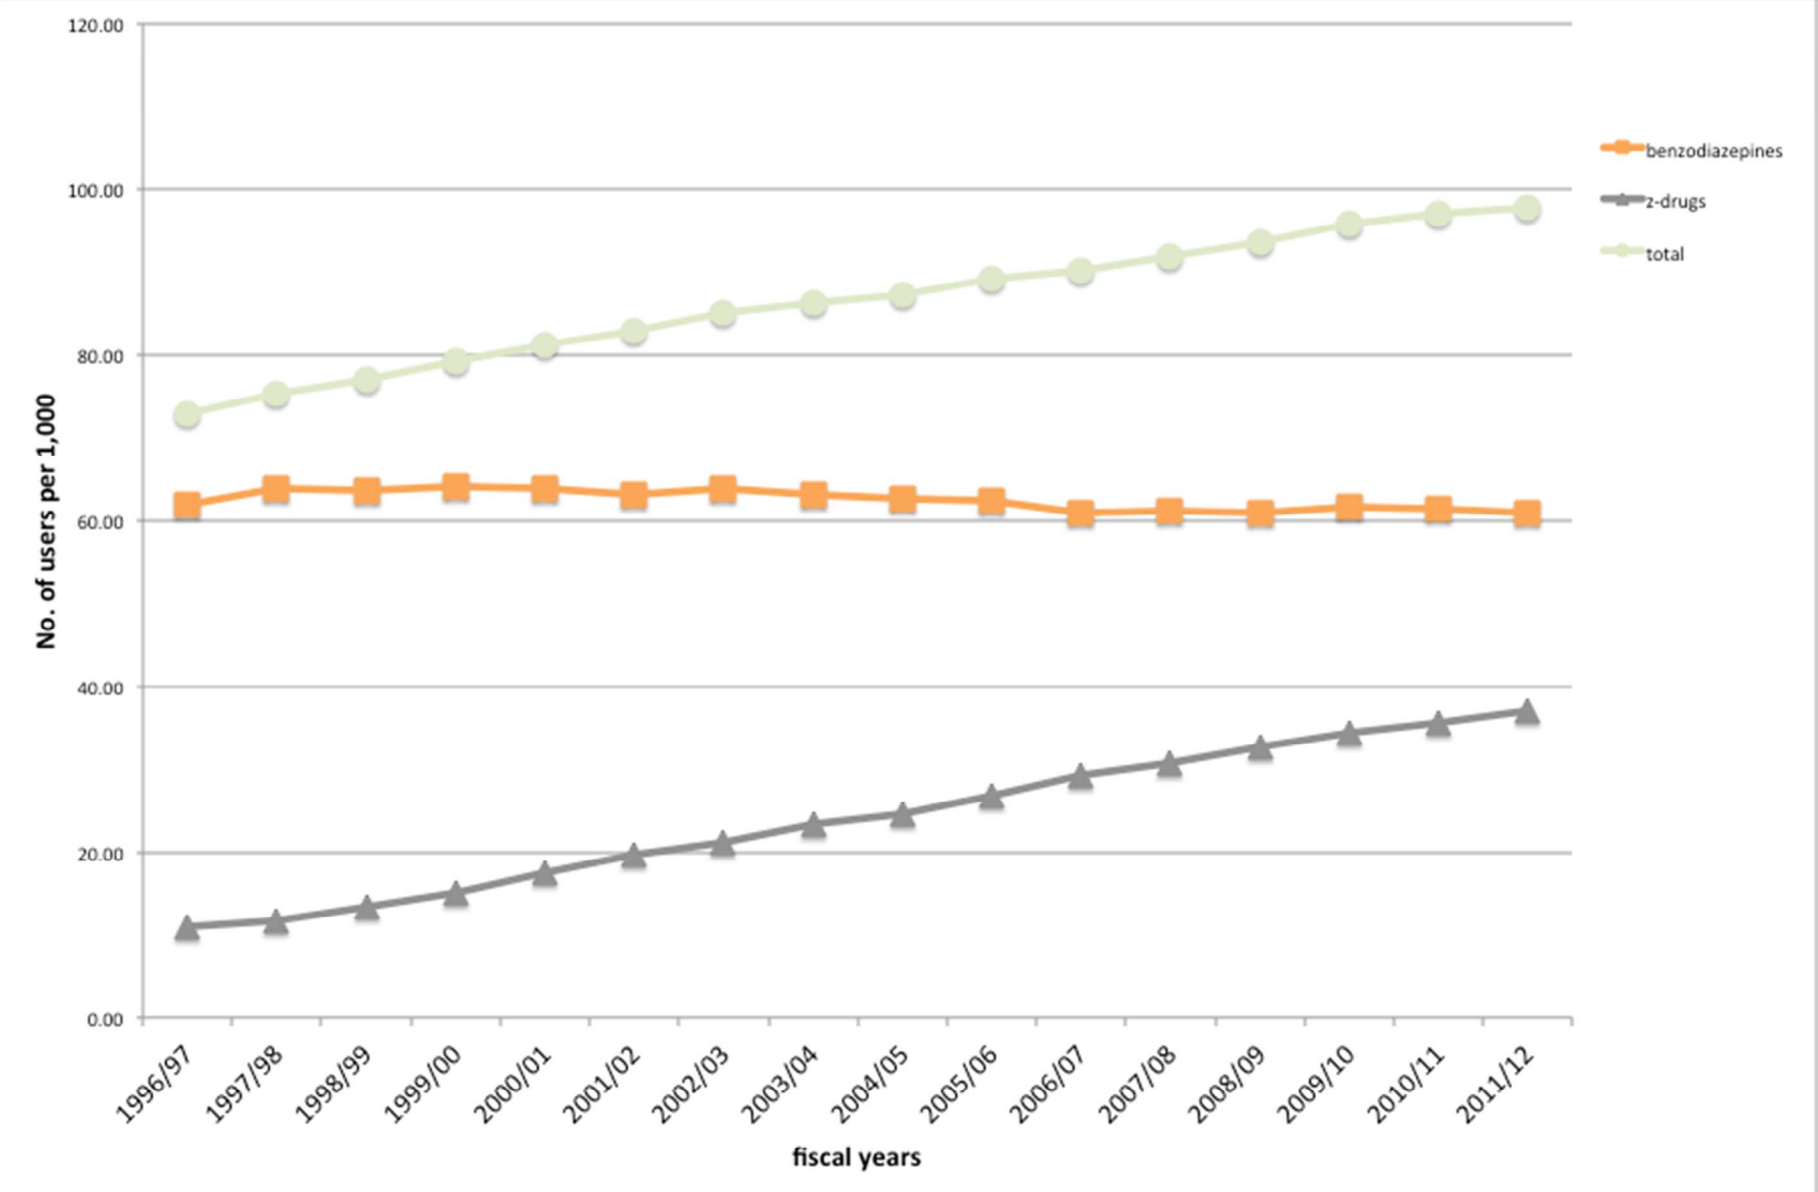

Figure 3 - Prevalence of use of benzodiazepines and Z-drugs

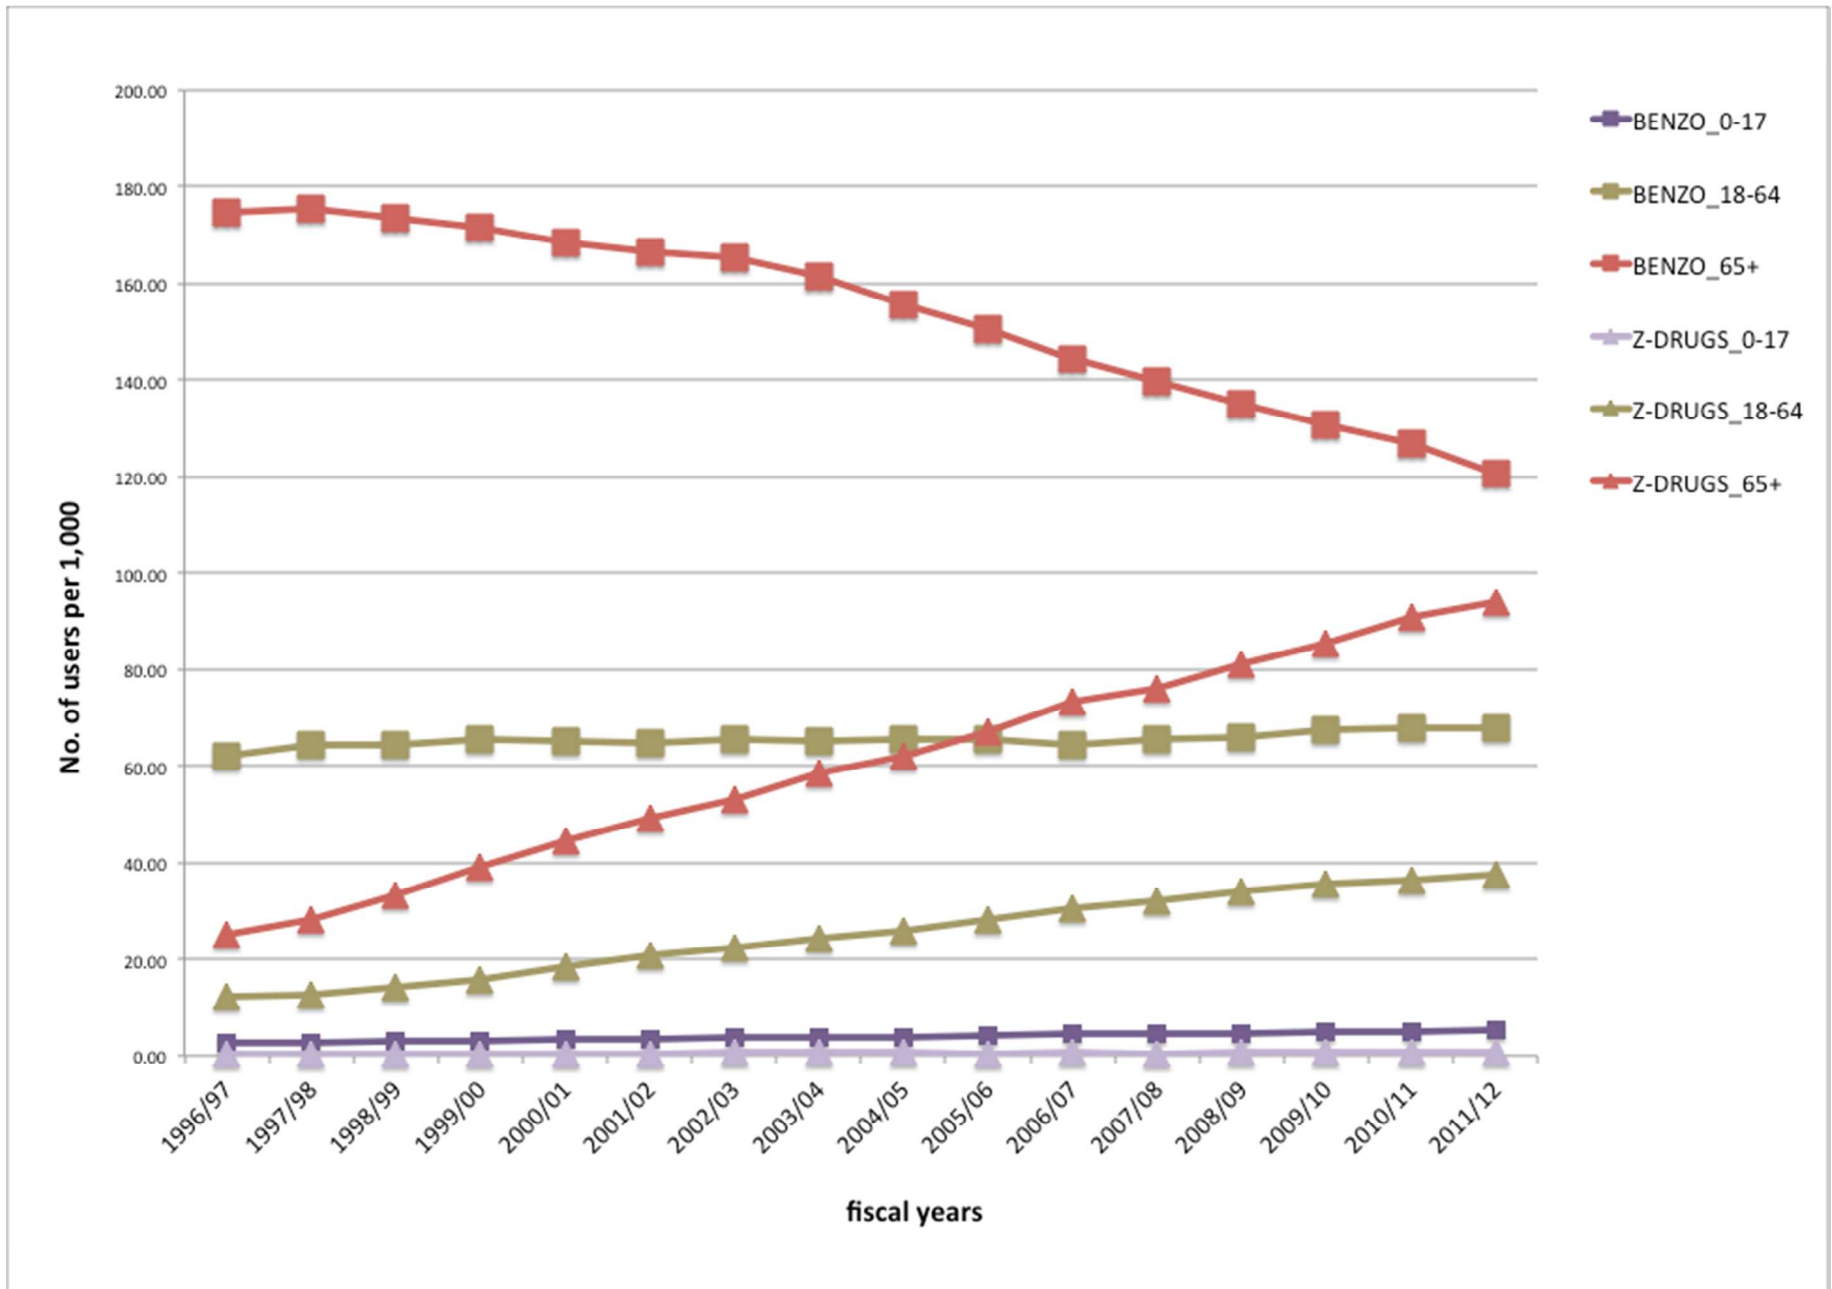

Figure 4- Prevalence of use of benzodiazepines and Z-drugs by age groups

**Table 1 - Incidence: effects of age, sex, region of residence and socioeconomic status**

| Medications                     | BZDs+z-drugs overall                  | BZDs alone               | Z-drugs alone                                  |
|---------------------------------|---------------------------------------|--------------------------|------------------------------------------------|
| <b>Users/1,000 year 1996/97</b> | <b>30.2</b>                           | <b>26.3</b>              | <b>3.9</b>                                     |
| <b>Users/1,000 year 2011/12</b> | <b>32.4</b>                           | <b>22.5</b>              | <b>9.9</b>                                     |
| <b>Change in rate per year</b>  | <b>1.00 NS</b>                        | <b>0.99*</b>             | <b>1.06*</b>                                   |
| <b>Age effect</b>               | <b>18-64 vs. 65+<br/>0 -17 vs.65+</b> | <b>0.65*<br/>0.06*</b>   | <b>0.70*<br/>0.07*</b>                         |
| <b>Sex effect</b>               | <b>male vs. female</b>                | <b>0.70*</b>             | <b>0.69*<br/>0.72*</b>                         |
| <b>Region effect</b>            | <b>rural vs. urban</b>                | <b>1.07 NS</b>           | <b>0.91 NS<br/>0.93 NS</b>                     |
| <b>SES effect</b>               | <b>high vs. low<br/>NF vs. low</b>    | <b>0.97 NS<br/>1.21*</b> | <b>0.93 NS<br/>1.32*<br/>1.10*<br/>0.85 NS</b> |

\* indicates a statistically significant effect ( $p < 0.05$ )

Note: results for change in yearly rate, age, sex, SES and region of residence effects are presented as relative rates (adjusted for age, SES, region and sex).

BZDs= Benzodiazepines, Z-drugs=zopiclone, zaleplon, NS = not significant, SES = socioeconomic status, NF = income unknown (includes individuals to whom a neighbourhood income cannot be assigned: residents of personal care homes, psychiatric facilities, prisons or wards of the Public Trustee and Child and Family services)

**Table 2 – Prevalence: effects of age, sex, region of residence and SES**

| <b>Medications</b>              | <b>BZDs+Z-drugs overall</b> | <b>BZDs alone</b> | <b>Z-drugs alone</b> |
|---------------------------------|-----------------------------|-------------------|----------------------|
| <b>Users/1,000 year 1996/97</b> | <b>72.8</b>                 | <b>66.7</b>       | <b>10.9</b>          |
| <b>Users/1,000 year 2011/12</b> | <b>97.9</b>                 | <b>72.4</b>       | <b>37.0</b>          |
| <b>Change in rate per year</b>  | <b>1.02*</b>                | <b>1.01 NS</b>    | <b>1.08*</b>         |
| <b>Age effect</b>               |                             |                   |                      |
| <b>18-64 vs. 65+</b>            | <b>0.50*</b>                | <b>0.52*</b>      | <b>0.44*</b>         |
| <b>0 -17 vs. 65+</b>            | <b>0.03*</b>                | <b>0.03*</b>      | <b>0.01*</b>         |
| <b>Sex effect</b>               |                             |                   |                      |
| <b>male vs. female</b>          | <b>0.66*</b>                | <b>0.65*</b>      | <b>0.64*</b>         |
| <b>Region effect</b>            |                             |                   |                      |
| <b>rural vs. urban</b>          | <b>0.88*</b>                | <b>0.85*</b>      | <b>1.04 NS</b>       |
| <b>SES effect</b>               |                             |                   |                      |
| <b>high vs. low</b>             | <b>0.91 NS</b>              | <b>0.88*</b>      | <b>1.02*</b>         |
| <b>NF vs. low</b>               | <b>1.53*</b>                | <b>1.56*</b>      | <b>1.25*</b>         |

\* indicates a statistically significant effect ( $p < 0.05$ )

Note: results for change in yearly rate, age, sex, SES and region of residence effects are presented as relative rates (adjusted for age, SES, region and sex).

BZDs= Benzodiazepines, Z-drugs=zopiclone, zaleplon, NS = not significant, SES = socioeconomic status, NF = income unknown (includes individuals to whom a neighbourhood income cannot be assigned: residents of personal care homes, psychiatric facilities, prisons or wards of the Public Trustee and Child and Family services)
